# Supplementary material
Source: PubMed Central journal article supplement (PMC2739891)
Supplement: NIHMS105080-supplement-1.pdf [file NIHMS105080-supplement-1.pdf]

**SUPPLEMENTARY MATERIALS for Xu et al., "Synaptotagmin-1 functions as Ca<sup>2+</sup>-sensor for spontaneous release"**

**Supplementary Table 1**

List of all electrophysiological results organized according the figures and supplementary figures of the paper. All data are from at least three independent neuronal cultures; if not specifically mentioned, statistical assessments were done by Student's t-test in Origin; Two-way ANOVA is done by Graphpad Prism

| Figure  | Genotype                        | Parameter                 | Mean Value | SEM   | P value                                                                                                        | Cell # |
|---------|---------------------------------|---------------------------|------------|-------|----------------------------------------------------------------------------------------------------------------|--------|
| Fig.1 b | WT+2mM Ca                       | mIPSC Frequency (Hz)      | 1.782      | 0.184 | P<0.001, compared with WT+0mM Ca; P<0.01, compared with WT+0mM Ca+Thapsigargin; P<0.001, compared with others; | 13     |
|         | WT+0mM Ca                       | mIPSC Frequency (Hz)      | 0.499      | 0.052 | P<0.001, compared with all others;                                                                             | 11     |
|         | WT+0mM Ca+BAPTA-AM              | mIPSC Frequency (Hz)      | 0.08       | 0.024 | P=0.8139, compared with WT+0mM Ca+Thapsigargin+BAPTA-AM                                                        | 9      |
|         | WT+0mM Ca+Thapsigargin          | mIPSC Frequency (Hz)      | 3.395      | 0.475 | P<0.001, compared with all others;                                                                             | 13     |
|         | WT+0mM Ca+Thapsigargin+BAPTA-AM | mIPSC Frequency (Hz)      | 0.071      | 0.029 | See above                                                                                                      | 12     |
| Fig.1 d | WT                              | mIPSC Frequency (Hz)      | 1.926      | 0.173 | P=0.8057 compared with ST1 KO+ST1 rescue                                                                       | 38     |
|         | ST1 KO                          | mIPSC Frequency (Hz)      | 15.257     | 1.114 | P<0.001 compared with the others                                                                               | 35     |
|         | ST1 KO + ST1 Rescue             | mIPSC Frequency (Hz)      | 2.005      | 0.297 | see above                                                                                                      | 19     |
|         | ST1 KO+BAPTA-AM                 | mIPSC Frequency (Hz)      | 0.087      | 0.042 | P<0.001 compared with the others                                                                               | 24     |
| Fig.1 f | WT                              | RRP, Charge transfer (nF) | 10.723     | 0.776 | P=0.9043 compared with WT+BAPTA-AM; P=0.8637 compared with ST1 KO; P=0.2732 compared with ST1 KO+BAPTA-AM      | 20     |
|         | WT+BAPTA-AM                     | RRP, Charge transfer (nF) | 10.564     | 1.093 | P=0.9249 compared with ST1 KO; P=0.3933 compared with ST1 KO+BAPTA-AM                                          | 12     |
|         | ST1 KO                          | RRP, Charge transfer (nF) | 10.414     | 1.395 | P=0.5546 compared with ST1 KO+BAPTA-AM                                                                         | 14     |
|         | ST1 KO+BAPTA-AM                 | RRP, Charge transfer (nF) | 9.34       | 0.796 | see above                                                                                                      | 10     |
| Fig.2 b | WT + 0.01mM Ca                  | mIPSC Frequency (Hz)      | 0.069      | 0.023 | Two-way ANOVA, P<0.001, compared with ST1 KO, for mIPSC Frquency                                               | 10     |
|         | WT + 0.2mM Ca                   | mIPSC Frequency (Hz)      | 0.111      | 0.024 |                                                                                                                | 10     |

|          |                    |                      |        |       |                                                                   |    |
|----------|--------------------|----------------------|--------|-------|-------------------------------------------------------------------|----|
|          | WT + 0.5mM Ca      | mIPSC Frequency (Hz) | 0.433  | 0.072 |                                                                   | 10 |
|          | WT + 1mM Ca        | mIPSC Frequency (Hz) | 1.354  | 0.172 |                                                                   | 10 |
|          | WT + 2mM Ca        | mIPSC Frequency (Hz) | 3.288  | 0.365 |                                                                   | 10 |
|          | WT + 5mM Ca        | mIPSC Frequency (Hz) | 6.019  | 0.552 |                                                                   | 10 |
|          | WT + 10mM Ca       | mIPSC Frequency (Hz) | 6.896  | 0.664 |                                                                   | 10 |
|          | ST1 KO + 0.01mM Ca | mIPSC Frequency (Hz) | 0.481  | 0.092 |                                                                   | 14 |
|          | ST1 KO + 0.2mM Ca  | mIPSC Frequency (Hz) | 2.151  | 0.465 |                                                                   | 14 |
|          | ST1 KO + 0.5mM Ca  | mIPSC Frequency (Hz) | 6.516  | 0.799 |                                                                   | 14 |
|          | ST1 KO + 1mM Ca    | mIPSC Frequency (Hz) | 8.521  | 0.965 |                                                                   | 14 |
|          | ST1 KO + 2mM Ca    | mIPSC Frequency (Hz) | 12.309 | 1.015 |                                                                   | 14 |
|          | ST1 KO + 5mM Ca    | mIPSC Frequency (Hz) | 13.246 | 0.982 |                                                                   | 14 |
|          | ST1 KO + 10mM Ca   | mIPSC Frequency (Hz) | 13.954 | 0.961 |                                                                   | 14 |
| Fig. 2 c | WT + 0.1mM Ca      | mEPSC Frequency (Hz) | 0.037  | 0.009 | Two-way ANOVA, P<0.001, compared with ST1 KO, for mEPSC Frequency | 9  |
|          | WT + 0.2mM Ca      | mEPSC Frequency (Hz) | 0.061  | 0.007 |                                                                   | 9  |
|          | WT + 0.5mM Ca      | mEPSC Frequency (Hz) | 0.194  | 0.032 |                                                                   | 9  |
|          | WT + 1mM Ca        | mEPSC Frequency (Hz) | 0.525  | 0.074 |                                                                   | 9  |
|          | WT + 2mM Ca        | mEPSC Frequency (Hz) | 1.829  | 0.199 |                                                                   | 9  |
|          | WT + 5mM Ca        | mEPSC Frequency (Hz) | 3.481  | 0.359 |                                                                   | 9  |
|          | WT + 10mM Ca       | mEPSC Frequency (Hz) | 4.231  | 0.4   |                                                                   | 9  |
|          | ST1 KO + 0.01mM Ca | mEPSC Frequency (Hz) | 0.379  | 0.079 |                                                                   | 12 |
|          | ST1 KO + 0.2mM Ca  | mEPSC Frequency (Hz) | 1.864  | 0.318 |                                                                   | 12 |
|          | ST1 KO + 0.5mM Ca  | mEPSC Frequency (Hz) | 6.173  | 0.584 |                                                                   | 12 |
|          | ST1 KO + 1mM Ca    | mEPSC Frequency (Hz) | 11.659 | 0.923 |                                                                   | 12 |
|          | ST1 KO + 2mM Ca    | mEPSC Frequency (Hz) | 16.235 | 1.18  |                                                                   | 12 |
|          | ST1 KO + 5mM Ca    | mEPSC Frequency (Hz) | 18.85  | 0.891 |                                                                   | 12 |
|          | ST1 KO + 10mM Ca   | mEPSC Frequency (Hz) | 20.08  | 1.055 |                                                                   | 12 |
| Fig.2 d  | WT, mIPSC          | Cooperativity        | 1.89   | 0.05  | P<0.001, compared with ST1 KO                                     | 10 |
|          | ST1 KO, mIPSC      | Cooperativity        | 1.52   | 0.03  | see above                                                         | 14 |
|          | WT, mIPSC          | Kd (mM)              | 2.24   | 0.07  | P<0.001, compared with ST1 KO                                     | 10 |
|          | ST1 KO, mIPSC      | Kd (mM)              | 0.71   | 0.06  | see above                                                         | 14 |

|          |                       |                      |       |       |                                                                                                                                                           |    |
|----------|-----------------------|----------------------|-------|-------|-----------------------------------------------------------------------------------------------------------------------------------------------------------|----|
| Fig.2 e  | WT, mEPSC             | Cooperativity        | 1.992 | 0.087 | P<0.001, compared with ST1 KO                                                                                                                             | 9  |
|          | ST1 KO, mEPSC         | Cooperativity        | 1.61  | 0.02  | see above                                                                                                                                                 | 12 |
|          | WT, mEPSC             | Kd (mM)              | 2.329 | 0.116 | P<0.001, compared with ST1 KO                                                                                                                             | 9  |
|          | ST1 KO, mEPSC         | Kd (mM)              | 0.84  | 0.02  | see above                                                                                                                                                 | 12 |
| Fig. 3 c | ST1-D2N WT + 0.5mM Ca | eIPSC amplitude (nA) | 0.169 | 0.029 | According to Two-way ANOVA, compare ST1-D2N WT with ST1-D2N, for eIPSC amplitude, P<0.001;                                                                | 10 |
|          | ST1-D2N WT + 1mM Ca   | eIPSC amplitude (nA) | 0.791 | 0.087 |                                                                                                                                                           | 10 |
|          | ST1-D2N WT + 2mM Ca   | eIPSC amplitude (nA) | 3.255 | 0.163 |                                                                                                                                                           | 10 |
|          | ST1-D2N WT + 5mM Ca   | eIPSC amplitude (nA) | 5.109 | 0.241 |                                                                                                                                                           | 10 |
|          | ST1-D2N WT + 10mM Ca  | eIPSC amplitude (nA) | 5.765 | 0.272 |                                                                                                                                                           | 10 |
|          | ST1-D2N + 0.5mM Ca    | eIPSC amplitude (nA) | 0.9   | 0.075 | According to Two-way ANOVA, compare ST1-D2N WT with ST1-D8N, for eIPSC amplitude, P<0.001; compare ST1-D2N WT with ST1-R3Q, for eIPSC amplitude, P<0.001; | 9  |
|          | ST1-D2N + 1mM Ca      | eIPSC amplitude (nA) | 2.599 | 0.024 |                                                                                                                                                           | 9  |
|          | ST1-D2N + 2mM Ca      | eIPSC amplitude (nA) | 5.669 | 0.251 |                                                                                                                                                           | 9  |
|          | ST1-D2N + 5mM Ca      | eIPSC amplitude (nA) | 6.81  | 0.288 |                                                                                                                                                           | 9  |
|          | ST1-D2N + 10mM Ca     | eIPSC amplitude (nA) | 7.227 | 0.248 |                                                                                                                                                           | 9  |
|          | ST1-D8N WT + 0.5mM Ca | eIPSC amplitude (nA) | 0.129 | 0.028 | According to Two-way ANOVA, compare ST1-D8N WT with ST1-D8N, for eIPSC amplitude, P<0.001;                                                                | 10 |
|          | ST1-D8N WT + 1mM Ca   | eIPSC amplitude (nA) | 0.726 | 0.108 |                                                                                                                                                           | 10 |
|          | ST1-D8N WT + 2mM Ca   | eIPSC amplitude (nA) | 3.296 | 0.379 |                                                                                                                                                           | 10 |
|          | ST1-D8N WT + 5mM Ca   | eIPSC amplitude (nA) | 5.451 | 0.277 |                                                                                                                                                           | 10 |
|          | ST1-D8N WT + 10mM Ca  | eIPSC amplitude (nA) | 6.117 | 0.248 |                                                                                                                                                           | 10 |
|          | ST1-D8N + 0.5mM Ca    | eIPSC amplitude (nA) | 0.161 | 0.041 | According to Two-way ANOVA, compare ST1-D8N WT with ST1-R3Q, for eIPSC amplitude, P<0.001;                                                                | 10 |
|          | ST1-D8N + 1mM Ca      | eIPSC amplitude (nA) | 0.724 | 0.135 |                                                                                                                                                           | 10 |
|          | ST1-D8N + 2mM Ca      | eIPSC amplitude (nA) | 1.805 | 0.077 |                                                                                                                                                           | 10 |
|          | ST1-D8N + 5mM Ca      | eIPSC amplitude (nA) | 4.101 | 0.139 |                                                                                                                                                           | 10 |
|          | ST1-D8N + 10mM Ca     | eIPSC amplitude (nA) | 4.624 | 0.192 |                                                                                                                                                           | 10 |
|          | ST1-R3Q WT + 0.5mM Ca | eIPSC amplitude (nA) | 0.198 | 0.026 | According to Two-way ANOVA, compare ST1-R3Q WT with ST1-R3Q, for eIPSC amplitude, P<0.001;                                                                | 10 |
|          | ST1-R3Q WT + 1mM Ca   | eIPSC amplitude (nA) | 0.898 | 0.171 |                                                                                                                                                           | 10 |

|          |                       |                              |       |        |                                                                                                                                                                                       |    |
|----------|-----------------------|------------------------------|-------|--------|---------------------------------------------------------------------------------------------------------------------------------------------------------------------------------------|----|
|          | ST1-R3Q WT + 2mM Ca   | eIPSC amplitude (nA)         | 3.347 | 0.193  |                                                                                                                                                                                       | 10 |
|          | ST1-R3Q WT + 5mM Ca   | eIPSC amplitude (nA)         | 4.641 | 0.329  |                                                                                                                                                                                       | 10 |
|          | ST1-R3Q WT + 10mM Ca  | eIPSC amplitude (nA)         | 5.895 | 0.343  |                                                                                                                                                                                       | 10 |
|          | ST1-R3Q + 0.5mM Ca    | eIPSC amplitude (nA)         | 0.159 | 0.027  | See above                                                                                                                                                                             | 10 |
|          | ST1-R3Q + 1mM Ca      | eIPSC amplitude (nA)         | 0.459 | 0.08   |                                                                                                                                                                                       | 10 |
|          | ST1-R3Q + 2mM Ca      | eIPSC amplitude (nA)         | 1.362 | 0.125  |                                                                                                                                                                                       | 10 |
|          | ST1-R3Q + 5mM Ca      | eIPSC amplitude (nA)         | 2.819 | 0.224  |                                                                                                                                                                                       | 10 |
|          | ST1-R3Q + 10mM Ca     | eIPSC amplitude (nA)         | 3.807 | 0.296  |                                                                                                                                                                                       | 10 |
| Fig.3 d  | ST1-D2N WT            | Kd for Ca <sup>2+</sup> (mM) | 1.843 | 0.111  | P<0.01, compared with ST1-D2N; P=0.885, compared with ST1-D8N WT; P<0.01, compared with ST1-D8N; P=0.8420, compared with ST1-R3Q WT; P<0.001, compared with ST1-R3Q                   | 9  |
|          | ST1-D2N               | Kd for Ca <sup>2+</sup> (mM) | 1.173 | 0.134  | P<0.001, compared with ST1-D8N WT; compared with ST1-D8N; P=0.0248, compared with ST1-R3Q WT; P<0.001, compared with ST1-R3Q;                                                         | 10 |
|          | ST1-D8N WT            | Kd for Ca <sup>2+</sup> (mM) | 1.844 | 0.098  | P<0.01, compared with ST1-D8N; P=0.941, compared with ST1-R3Q WT; P<0.001, compared with ST1-R3Q;                                                                                     | 10 |
|          | ST1-D8N               | Kd for Ca <sup>2+</sup> (mM) | 2.483 | 0.181  | P=0.1331, compared with ST1-R3Q WT; P=0.0227<0.05, compared with ST1-R3Q                                                                                                              | 10 |
|          | ST1-R3Q WT            | Kd for Ca <sup>2+</sup> (mM) | 1.871 | 0.344  | P<0.01, compared with ST1-R3Q;                                                                                                                                                        | 10 |
|          | ST1-R3Q               | Kd for Ca <sup>2+</sup> (mM) | 3.518 | 0.374  | see above                                                                                                                                                                             | 10 |
| Fig. 4 b | ST1-D2N WT + 0.2mM Ca | mIPSC Frequency (Hz)         | 0.118 | 0.014  | According to Two-way ANOVA, compare ST1-D2N WT with ST1-D2N, for mIPSC amplitude, P=0.0011<0.01;                                                                                      | 8  |
|          | ST1-D2N WT + 0.5mM Ca | mIPSC Frequency (Hz)         | 0.435 | 0.066  |                                                                                                                                                                                       | 8  |
|          | ST1-D2N WT + 1mM Ca   | mIPSC Frequency (Hz)         | 1.3   | 0.112  |                                                                                                                                                                                       | 8  |
|          | ST1-D2N WT + 2mM Ca   | mIPSC Frequency (Hz)         | 3.003 | 0.454  |                                                                                                                                                                                       | 8  |
|          | ST1-D2N WT + 5mM Ca   | mIPSC Frequency (Hz)         | 6.315 | 0.899  |                                                                                                                                                                                       | 8  |
|          | ST1-D2N WT + 10mM Ca  | mIPSC Frequency (Hz)         | 7.19  | 1.039  |                                                                                                                                                                                       | 8  |
|          | ST1-D2N + 0.2mM Ca    | mIPSC Frequency (Hz)         | 0.136 | 0.0226 | According to Two-way ANOVA, compare ST1-D2N with ST1-D8N, for mIPSC amplitude, P=0.0011<0.01; According to Two-way ANOVA, compare ST1-D2N with ST1-R3Q, for mIPSC amplitude, P<0.001; | 9  |
|          | ST1-D2N + 0.5mM Ca    | mIPSC Frequency (Hz)         | 0.798 | 0.12   |                                                                                                                                                                                       | 9  |
|          | ST1-D2N + 1mM Ca      | mIPSC Frequency (Hz)         | 2.477 | 0.215  |                                                                                                                                                                                       | 9  |

|  |                       |                         |        |       |                                                                                                      |    |
|--|-----------------------|-------------------------|--------|-------|------------------------------------------------------------------------------------------------------|----|
|  | ST1-D2N + 2mM Ca      | mIPSC<br>Frequency (Hz) | 5.272  | 0.384 |                                                                                                      | 9  |
|  | ST1-D2N + 5mM Ca      | mIPSC<br>Frequency (Hz) | 7.2124 | 0.549 |                                                                                                      | 9  |
|  | ST1-D2N + 10mM Ca     | mIPSC<br>Frequency (Hz) | 8.283  | 0.673 |                                                                                                      | 9  |
|  | ST1-D8N WT + 0.2mM Ca | mIPSC<br>Frequency (Hz) | 0.112  | 0.023 | According to Two-way ANOVA,<br>compare ST1-D8N WT with ST1-<br>D8N, for mIPSC amplitude,<br>P<0.001; | 10 |
|  | ST1-D8N WT + 0.5mM Ca | mIPSC<br>Frequency (Hz) | 0.408  | 0.043 |                                                                                                      | 10 |
|  | ST1-D8N WT + 1mM Ca   | mIPSC<br>Frequency (Hz) | 1.456  | 0.164 |                                                                                                      | 10 |
|  | ST1-D8N WT + 2mM Ca   | mIPSC<br>Frequency (Hz) | 3.456  | 0.278 |                                                                                                      | 10 |
|  | ST1-D8N WT + 5mM Ca   | mIPSC<br>Frequency (Hz) | 6.148  | 0.365 |                                                                                                      | 10 |
|  | ST1-D8N WT + 10mM Ca  | mIPSC<br>Frequency (Hz) | 6.76   | 0.381 |                                                                                                      | 10 |
|  | ST1-D8N + 0.2mM Ca    | mIPSC<br>Frequency (Hz) | 0.094  | 0.025 | According to Two-way ANOVA,<br>compare ST1-D8N with ST1-R3Q,<br>for mIPSC amplitude, P<0.01;         | 10 |
|  | ST1-D8N + 0.5mM Ca    | mIPSC<br>Frequency (Hz) | 0.426  | 0.107 |                                                                                                      | 10 |
|  | ST1-D8N + 1mM Ca      | mIPSC<br>Frequency (Hz) | 0.994  | 0.064 |                                                                                                      | 10 |
|  | ST1-D8N + 2mM Ca      | mIPSC<br>Frequency (Hz) | 2.096  | 0.312 |                                                                                                      | 10 |
|  | ST1-D8N + 5mM Ca      | mIPSC<br>Frequency (Hz) | 4.609  | 0.285 |                                                                                                      | 10 |
|  | ST1-D8N + 10mM Ca     | mIPSC<br>Frequency (Hz) | 5.424  | 0.344 |                                                                                                      | 10 |
|  | ST1-R3Q WT + 0.2mM Ca | mIPSC<br>Frequency (Hz) | 0.085  | 0.015 | According to Two-way ANOVA,<br>compare ST1-R3Q WT with ST1-<br>R3Q, for mIPSC amplitude,<br>P<0.001; | 8  |
|  | ST1-R3Q WT + 0.5mM Ca | mIPSC<br>Frequency (Hz) | 0.385  | 0.042 |                                                                                                      | 8  |
|  | ST1-R3Q WT + 1mM Ca   | mIPSC<br>Frequency (Hz) | 1.1575 | 0.106 |                                                                                                      | 8  |
|  | ST1-R3Q WT + 2mM Ca   | mIPSC<br>Frequency (Hz) | 3.175  | 0.145 |                                                                                                      | 8  |
|  | ST1-R3Q WT + 5mM Ca   | mIPSC<br>Frequency (Hz) | 5.678  | 0.355 |                                                                                                      | 8  |
|  | ST1-R3Q WT + 10mM Ca  | mIPSC<br>Frequency (Hz) | 6.795  | 0.514 |                                                                                                      | 8  |
|  | ST1-R3Q + 0.2mM Ca    | mIPSC<br>Frequency (Hz) | 0.053  | 0.009 | see above                                                                                            | 10 |
|  | ST1-R3Q + 0.5mM Ca    | mIPSC<br>Frequency (Hz) | 0.264  | 0.041 |                                                                                                      | 10 |
|  | ST1-R3Q + 1mM Ca      | mIPSC<br>Frequency (Hz) | 0.587  | 0.083 |                                                                                                      | 10 |
|  | ST1-R3Q + 2mM Ca      | mIPSC<br>Frequency (Hz) | 1.367  | 0.116 |                                                                                                      | 10 |
|  | ST1-R3Q + 5mM Ca      | mIPSC<br>Frequency (Hz) | 3.324  | 0.221 |                                                                                                      | 10 |
|  | ST1-R3Q + 10mM Ca     | mIPSC<br>Frequency (Hz) | 4.241  | 0.237 |                                                                                                      | 10 |

|          |                                         |                                  |       |       |                                                                                                                            |    |
|----------|-----------------------------------------|----------------------------------|-------|-------|----------------------------------------------------------------------------------------------------------------------------|----|
| Fig.4 c  | ST1-D2N WT                              | Kd for Ca <sup>2+</sup> (mM)     | 2.383 | 0.076 | P<0.001, compared with ST1-D2N;                                                                                            | 8  |
|          | ST1-D2N                                 | Kd for Ca <sup>2+</sup> (mM)     | 1.624 | 0.076 | P<0.001, compared with ST1-D8N;<br>P<0.001, compared with ST1-R3Q                                                          | 9  |
|          | ST1-D8N WT                              | Kd for Ca <sup>2+</sup> (mM)     | 2.024 | 0.065 | P<0.01, compared with ST1-D8N;                                                                                             | 10 |
|          | ST1-D8N                                 | Kd for Ca <sup>2+</sup> (mM)     | 2.686 | 0.208 | P<0.01, compared with ST1-R3Q;                                                                                             | 10 |
|          | ST1-R3Q WT                              | Kd for Ca <sup>2+</sup> (mM)     | 2.351 | 0.139 | P<0.001, compared with ST1-R3Q;                                                                                            | 8  |
|          | ST1-R3Q                                 | Kd for Ca <sup>2+</sup> (mM)     | 3.409 | 0.128 | see above                                                                                                                  | 10 |
| Fig.5 b  | ST1-D2N WT                              | mIPSC Frequency (Hz), Slices     | 2.735 | 0.458 | P=0.0276<0.05, compared with ST1-D2N;                                                                                      | 10 |
|          | ST1-D2N                                 | mIPSC Frequency (Hz), Slices     | 4.783 | 0.739 | P<0.001, compared with ST1-R3Q; P<0.001, compared with ST1-D8N;                                                            | 9  |
|          | ST1-D8N WT                              | mIPSC Frequency (Hz), Slices     | 2.353 | 0.095 | P<0.001, compared with ST1-D8N;                                                                                            | 15 |
|          | ST1-D8N                                 | mIPSC Frequency (Hz), Slices     | 1.521 | 0.133 | P=0.0118<0.05, compared with ST1-D8N;                                                                                      | 23 |
|          | ST1-R3Q WT                              | mIPSC Frequency (Hz), Slices     | 2.69  | 0.277 | P<0.001, compared with ST1-R3Q;                                                                                            | 20 |
|          | ST1-R3Q                                 | mIPSC Frequency (Hz), Slices     | 1.114 | 0.069 | See above                                                                                                                  | 21 |
| Fig. 5 d | ST1-D2N WT, before Nicotine application | mIPSC Frequency(Hz), brain slice | 2.573 | 0.162 | P<0.001, compared with ST1-D2N WT, after Nicotine application; P<0.01, compared with ST1-D2N, before Nicotine application; | 9  |
|          | ST1-D2N WT, after Nicotine application  | mIPSC Frequency(Hz), brain slice | 4.492 | 0.163 | P<0.001, compared with ST1-D2N, after Nicotine application                                                                 | 9  |
|          | ST1-D2N , before Nicotine application   | mIPSC Frequency(Hz), brain slice | 3.985 | 0.339 | P<0.001, compared with ST1-D2N, after Nicotine application                                                                 | 13 |
|          | ST1-D2N , after Nicotine application    | mIPSC Frequency(Hz), brain slice | 6.349 | 0.305 | see above                                                                                                                  | 13 |
|          | ST1-D8N WT, before Nicotine application | mIPSC Frequency(Hz), brain slice | 2.671 | 0.103 | P<0.001, compared with ST1-D8N WT, after Nicotine application; P<0.001, compared with ST1-D8N, before Nicotine application | 10 |
|          | ST1-D8N WT, after Nicotine application  | mIPSC Frequency(Hz), brain slice | 4.033 | 0.181 | P<0.001, compared with ST1-D8N, after Nicotine application                                                                 | 10 |
|          | ST1-D8N , before Nicotine application   | mIPSC Frequency(Hz), brain slice | 1.801 | 0.092 | P<0.001, compared with ST1-D8N, after Nicotine application                                                                 | 17 |
|          | ST1-D8N , after Nicotine application    | mIPSC Frequency(Hz), brain slice | 2.94  | 0.143 | see above                                                                                                                  | 17 |
|          | ST1-R3Q WT, before Nicotine application | mIPSC Frequency(Hz), brain slice | 2.817 | 0.275 | P<0.01, compared with ST1-R3Q WT, after nicotine application; P=0.0349<0.05, compared with ST1-R3Q, before Nicotine        | 9  |

|          |                                        |                                  |        |       |                                                                                                                                                                                                                                                                                |    |
|----------|----------------------------------------|----------------------------------|--------|-------|--------------------------------------------------------------------------------------------------------------------------------------------------------------------------------------------------------------------------------------------------------------------------------|----|
|          |                                        |                                  |        |       | application;                                                                                                                                                                                                                                                                   |    |
|          | ST1-R3Q WT, after Nicotine application | mIPSC Frequency(Hz), brain slice | 4.143  | 0.327 | P=0.0696, compared with ST1-R3Q, after Nicotine application                                                                                                                                                                                                                    | 9  |
|          | ST1-R3Q , before Nicotine application  | mIPSC Frequency(Hz), brain slice | 1.898  | 0.314 | P=0.0179<0.05, compared with ST1-R3Q, after Nicotine application                                                                                                                                                                                                               | 12 |
|          | ST1-R3Q , after Nicotine application   | mIPSC Frequency(Hz), brain slice | 3.148  | 0.374 | see above                                                                                                                                                                                                                                                                      | 12 |
| Fig. 6 b | WT                                     | eIPSC amplitude (nA)             | 3.034  | 0.222 | P=0.763, compared with Syt1 rescue; P<0.001, compared all the rest                                                                                                                                                                                                             | 14 |
|          | Syt1 KO                                | eIPSC amplitude (nA)             | 0.085  | 0.018 | P<0.001, compared with Syt1 rescue and Syt1-C2A-3DA rescue; P=0.0677, compared with Syt1-C2B-3DA rescue; P=0.0978, compared with Syt1-C2AB-6DA rescue                                                                                                                          | 14 |
|          | Syt1 KO + Syt1 rescue                  | eIPSC amplitude (nA)             | 2.955  | 0.133 | P<0.001, compared with all other rescues                                                                                                                                                                                                                                       | 14 |
|          | Syt1 KO + Syt1 C2A-3DA rescue          | eIPSC amplitude (nA)             | 1.42   | 0.208 | P<0.001, compared with Syt1-C2B-3DA rescue and Syt1-C2AB-6DA rescue                                                                                                                                                                                                            | 17 |
|          | Syt1 KO + Syt1 C2B-3DA rescue          | eIPSC amplitude (nA)             | 0.173  | 0.045 | P=0.7165, compared with Syt1-C2AB-6DA rescue                                                                                                                                                                                                                                   | 13 |
|          | Syt1 KO + Syt1 C2AB-6DA rescue         | eIPSC amplitude (nA)             | 0.15   | 0.037 | see above                                                                                                                                                                                                                                                                      | 10 |
| Fig. 6 c | WT                                     | mIPSC Frequency (Hz)             | 2.092  | 0.158 | P<0.001, compared with Syt1 KO; P=0.7891 compared with Syt1 rescue; P<0.001, compared with others                                                                                                                                                                              | 18 |
|          | Syt1 KO                                | mIPSC Frequency (Hz)             | 14.646 | 1.307 | P<0.001, compared with Syt1 rescue; P=0.0215<0.05, compared with Syt1-C2A-3DA rescue; P<0.001, compared with Syt1-C2B-3DA rescue; P=0.8134, compared with Syt1-C2AB-6DA rescue                                                                                                 | 29 |
|          | Syt1 KO + Syt1 rescue                  | mIPSC Frequency (Hz)             | 2.001  | 0.296 | P<0.001 compared with other three rescues                                                                                                                                                                                                                                      | 19 |
|          | Syt1 KO + Syt1 C2A-3DA rescue          | mIPSC Frequency (Hz)             | 11.099 | 0.7   | P<0.001, compared with Syt1-C2B-3DA rescue; P<0.01, compared with Syt1-C2AB-6DA rescue                                                                                                                                                                                         | 28 |
|          | Syt1 KO + Syt1 C2B-3DA rescue          | mIPSC Frequency (Hz)             | 6.421  | 0.776 | P<0.001, compared with Syt1-C2AB-6DA rescue                                                                                                                                                                                                                                    | 28 |
|          | Syt1 KO + Syt1 C2AB-6DA rescue         | mIPSC Frequency (Hz)             | 14.296 | 0.6   | see above                                                                                                                                                                                                                                                                      | 28 |
| Fig. 6 d | WT + 0.01mM Ca                         | mIPSC Frequency (Hz)             | 0.058  | 0.012 | According to Two-way ANOVA, compare WT with syt1 KO, for mIPSC frequency, P<0.001; According to Two-way ANOVA, compare WT with syt1 C2A3DA rescue, for mIPSC frequency, P<0.001; According to Two-way ANOVA, compare WT with syt1 C2B3DA rescue, for mIPSC frequency, P<0.001; | 8  |

|                                           |                      |        |       |                                                                                                                                                                                                 |   |
|-------------------------------------------|----------------------|--------|-------|-------------------------------------------------------------------------------------------------------------------------------------------------------------------------------------------------|---|
| WT + 0.2mM Ca                             | mIPSC Frequency (Hz) | 0.098  | 0.017 |                                                                                                                                                                                                 | 8 |
| WT + 0.5mM Ca                             | mIPSC Frequency (Hz) | 0.369  | 0.031 |                                                                                                                                                                                                 | 8 |
| WT + 1mM Ca                               | mIPSC Frequency (Hz) | 1.269  | 0.128 |                                                                                                                                                                                                 | 8 |
| WT + 2mM Ca                               | mIPSC Frequency (Hz) | 3.184  | 0.252 |                                                                                                                                                                                                 | 8 |
| WT + 5mM Ca                               | mIPSC Frequency (Hz) | 5.975  | 0.424 |                                                                                                                                                                                                 | 8 |
| WT + 10mM Ca                              | mIPSC Frequency (Hz) | 6.776  | 0.485 |                                                                                                                                                                                                 | 8 |
| Syt1 KO + 0.01mM Ca                       | mIPSC Frequency (Hz) | 0.428  | 0.115 | According to Two-way ANOVA, compare syt1 KO with syt1C2A3DA rescue, for mIPSC frequency, P<0.001; According to Two-way ANOVA, compare WT with syt1 C2B3DA rescue, for mIPSC frequency, P<0.001; | 8 |
| Syt1 KO + 0.2mM Ca                        | mIPSC Frequency (Hz) | 2.845  | 0.767 |                                                                                                                                                                                                 | 8 |
| Syt1 KO + 0.5mM Ca                        | mIPSC Frequency (Hz) | 7.576  | 0.863 |                                                                                                                                                                                                 | 8 |
| Syt1 KO + 1mM Ca                          | mIPSC Frequency (Hz) | 10.534 | 0.886 |                                                                                                                                                                                                 | 8 |
| Syt1 KO + 2mM Ca                          | mIPSC Frequency (Hz) | 14.204 | 1.101 |                                                                                                                                                                                                 | 8 |
| Syt1 KO + 5mM Ca                          | mIPSC Frequency (Hz) | 15.337 | 1.124 |                                                                                                                                                                                                 | 8 |
| Syt1 KO + 10mM Ca                         | mIPSC Frequency (Hz) | 15.897 | 1.212 |                                                                                                                                                                                                 | 8 |
| Syt1 KO + Syt1-C2A-3DA rescue + 0.01mM Ca | mIPSC Frequency (Hz) | 0.131  | 0.014 | According to Two-way ANOVA, compare syt1 KO with syt1C2A3DA rescue, for mIPSC frequency, P<0.001;                                                                                               | 8 |
| Syt1 KO + Syt1-C2A-3DA rescue + 0.2mM Ca  | mIPSC Frequency (Hz) | 1.014  | 0.132 |                                                                                                                                                                                                 | 8 |
| Syt1 KO + Syt1-C2A-3DA rescue + 0.5mM Ca  | mIPSC Frequency (Hz) | 3.17   | 0.336 |                                                                                                                                                                                                 | 8 |
| Syt1 KO + Syt1-C2A-3DA rescue + 1mM Ca    | mIPSC Frequency (Hz) | 6.138  | 0.375 |                                                                                                                                                                                                 | 8 |
| Syt1 KO + Syt1-C2A-3DA rescue + 2mM Ca    | mIPSC Frequency (Hz) | 9.309  | 0.502 |                                                                                                                                                                                                 | 8 |
| Syt1 KO + Syt1-C2A-3DA rescue + 5mM Ca    | mIPSC Frequency (Hz) | 11.499 | 0.59  |                                                                                                                                                                                                 | 8 |
| Syt1 KO + Syt1-C2A-3DA rescue + 10mM Ca   | mIPSC Frequency (Hz) | 12.299 | 0.646 |                                                                                                                                                                                                 | 8 |



|          |                                           |                                |         |         |                                                                                                          |    |
|----------|-------------------------------------------|--------------------------------|---------|---------|----------------------------------------------------------------------------------------------------------|----|
|          | Syt1 KO + Syt1-C2B-3DA rescue + 0.01mM Ca | mIPSC Frequency (Hz)           | 0.223   | 0.027   | see above                                                                                                | 8  |
|          | Syt1 KO + Syt1-C2B-3DA rescue + 0.2mM Ca  | mIPSC Frequency (Hz)           | 1.156   | 0.114   |                                                                                                          | 8  |
|          | Syt1 KO + Syt1-C2B-3DA rescue + 0.5mM Ca  | mIPSC Frequency (Hz)           | 3.276   | 0.362   |                                                                                                          | 8  |
|          | Syt1 KO + Syt1-C2B-3DA rescue + 1mM Ca    | mIPSC Frequency (Hz)           | 5.38    | 0.454   |                                                                                                          | 8  |
|          | Syt1 KO + Syt1-C2B-3DA rescue + 2mM Ca    | mIPSC Frequency (Hz)           | 7.559   | 0.444   |                                                                                                          | 8  |
|          | Syt1 KO + Syt1-C2B-3DA rescue + 5mM Ca    | mIPSC Frequency (Hz)           | 8.573   | 0.711   |                                                                                                          | 8  |
|          | Syt1 KO + Syt1-C2B-3DA rescue + 10mM Ca   | mIPSC Frequency (Hz)           | 9.29    | 0.611   |                                                                                                          | 8  |
| Fig. 6 e | WT                                        | Ca <sup>2+</sup> cooperativity | 1.987   | 0.072   | P=0.0343<0.05, compared with Syt1 KO; P<0.01, compared with Syt1-C2A-3DA rescue and Syt1-C2B-3DA rescue; | 8  |
|          | Syt1 KO                                   | Ca <sup>2+</sup> cooperativity | 1.567   | 0.164   | P=0.872, compared with Syt1-C2A-3DA rescue; P=0.5573, compared with Syt1-C2B-3DA rescue;                 | 8  |
|          | Syt1 KO + Syt1-C2A-3DA                    | Ca <sup>2+</sup> cooperativity | 1.538   | 0.065   | P=0.405, compared with Syt1-C2B-3DA rescue                                                               | 8  |
|          | Syt1 KO + Syt1-C2B-3DA                    | Ca <sup>2+</sup> cooperativity | 1.462   | 0.06    | see above                                                                                                | 8  |
| Fig. 6 f | WT                                        | Kd (mM)                        | 2.244   | 0.078   | P<0.001, compared with all the rest                                                                      | 8  |
|          | Syt1 KO                                   | Kd (mM)                        | 0.629   | 0.102   | P<0.01, compared with Syt1-C2A-3DA rescue; P=0.121, compared with Syt1-C2B-3DA                           | 8  |
|          | Syt1 KO + Syt1-C2A-3DA                    | Kd (mM)                        | 1.044   | 0.031   | P<0.001, compared with Syt1-C2B-3DA rescue                                                               | 8  |
|          | Syt1 KO + Syt1-C2B-3DA                    | Kd (mM)                        | 0.806   | 0.033   | see above                                                                                                | 8  |
| Fig. 7 c | WT + 0.5mM Ca                             | eIPSC amplitude (nA)           | 0.18642 | 0.02147 | According to Two-way ANOVA, compare ST1-D2N WT with ST1-D2N, for eIPSC amplitude, P<0.001;               | 8  |
|          | WT + 1mM Ca                               | eIPSC amplitude (nA)           | 0.85865 | 0.09933 |                                                                                                          | 8  |
|          | WT + 2mM Ca                               | eIPSC amplitude (nA)           | 3.39997 | 0.18793 |                                                                                                          | 8  |
|          | WT + 5mM Ca                               | eIPSC amplitude (nA)           | 5.15096 | 0.24384 |                                                                                                          | 8  |
|          | WT + 10mM Ca                              | eIPSC amplitude (nA)           | 6.05015 | 0.21035 |                                                                                                          | 8  |
|          | ST1-2xLinker + 0.5mM Ca                   | eIPSC amplitude (nA)           | 0.23692 | 0.06206 |                                                                                                          | 12 |
|          | ST1-2xLinker + 1mM Ca                     | eIPSC amplitude (nA)           | 0.38952 | 0.0602  |                                                                                                          | 12 |
|          | ST1-2xLinker + 2mM Ca                     | eIPSC amplitude (nA)           | 1.88884 | 0.16747 |                                                                                                          | 12 |

|                |                        |                                          |         |         |                                                                                                                                               |    |
|----------------|------------------------|------------------------------------------|---------|---------|-----------------------------------------------------------------------------------------------------------------------------------------------|----|
| Fig. 7 e       | ST1-2xLinker + 5mM Ca  | eIPSC amplitude (nA)                     | 3.45591 | 0.36635 |                                                                                                                                               | 12 |
|                | ST1-2xLinker + 10mM Ca | eIPSC amplitude (nA)                     | 3.77317 | 0.50218 |                                                                                                                                               | 12 |
|                | WT                     | mIPSC frequency (Hz)                     | 2.052   | 0.17236 | P=0.5142, compared with Syt1-2Xlinker                                                                                                         | 35 |
|                | Syt1-2xlinker          | mIPSC frequency (Hz)                     | 1.85832 | 0.25242 |                                                                                                                                               | 21 |
| Suppl Fig. 1 b | WT+2mM Ca              | mIPSC Frequency (Hz)                     | 2.625   | 0.304   | P<0.001 compared with other four genotypes                                                                                                    | 15 |
|                | WT+EGTA-AM+2mM Ca      | mIPSC Frequency (Hz)                     | 0.338   | 0.0617  | P<0.001 compared with other four genotypes                                                                                                    | 14 |
|                | WT+BAPTA-AM+2mM Ca     | mIPSC Frequency (Hz)                     | 0.0764  | 0.0167  | P<0.001 compared with WT+EGTA-AM+2mM Ca; P=0.8311 compared with WT+BAPTA-AM-0mM Ca; P=0.1580 compared with WT+EGTA-AM+0mM Ca                  | 14 |
|                | WT+EGTA-AM+0mM Ca      | mIPSC Frequency (Hz)                     | 0.0429  | 0.0136  | P=0.2488 compared with WT+BAPTA-AM+0mM Ca                                                                                                     | 10 |
|                | WT+BAPTA-AM+0mM Ca     | mIPSC Frequency (Hz)                     | 0.0715  | 0.0141  | see above                                                                                                                                     | 26 |
|                |                        |                                          |         |         |                                                                                                                                               |    |
| Suppl Fig. 2b  | WT Con                 | mEPSC Frequency (Hz)                     | 2.613   | 0.159   | P<0.001, compared with WT Con+ Caffeine                                                                                                       | 15 |
|                | WT Con + Caffeine      | mEPSC Frequency (Hz)                     | 5.545   | 0.356   | see above                                                                                                                                     | 11 |
| Suppl Fig. 4a  | ST1-D2N WT             | Apparent Ca <sup>2+</sup> -cooperativity | 2.769   | 0.424   | P=0.4534, compared with ST1-D2N; P=0.8006, compared with ST1-D8N WT; P=0.1947, compared with ST1-R3Q WT; P=0.0153<0.05, compared with ST1-R3Q | 9  |
|                | ST1-D2N                | Apparent Ca <sup>2+</sup> -cooperativity | 2.436   | 0.153   | P=0.2970, compared with ST1-D8N WT; P=0.2901, compared with ST1-D8N; P=0.6805, compared with ST1-R3Q WT; P<0.001, compared with ST1-R3Q       | 10 |
|                | ST1-D8N WT             | Apparent Ca <sup>2+</sup> -cooperativity | 2.923   | 0.426   | P=0.1213, compared with ST1-D8N; P=0.2663, compared with ST1-R3Q WT; P<0.01, compared with ST1-R3Q;                                           | 10 |
|                | ST1-D8N                | Apparent Ca <sup>2+</sup> -cooperativity | 2.133   | 0.233   | P=0.7764, compared with ST1-R3Q WT; P=0.0731, compared with ST1-R3Q;                                                                          | 10 |
|                | ST1-R3Q WT             | Apparent Ca <sup>2+</sup> -cooperativity | 2.263   | 0.386   | P=0.1318, compared with ST1-R3Q;                                                                                                              | 10 |
|                | ST1-R3Q                | Apparent Ca <sup>2+</sup> -cooperativity | 1.615   | 0.142   | see above                                                                                                                                     | 10 |
| Suppl Fig. 4b  | ST1-D2N WT             | Apparent Ca <sup>2+</sup> -cooperativity | 1.813   | 0.058   | P=0.3707, compared with ST1-D2N;                                                                                                              | 8  |
|                | ST1-D2N                | Apparent Ca <sup>2+</sup> -cooperativity | 2.012   | 0.196   | P=0.4458, compared with ST1-D8N; P=0.3798, compared with ST1-R3Q                                                                              | 9  |
|                | ST1-D8N WT             | Apparent Ca <sup>2+</sup> -cooperativity | 2.008   | 0.077   | P=0.2378, compared with ST1-D8N;                                                                                                              | 10 |
|                | ST1-D8N                | Apparent Ca <sup>2+</sup> -cooperativity | 1.839   | 0.115   | P=0.9240, compared with ST1-R3Q;                                                                                                              | 10 |
|                | ST1-R3Q WT             | Apparent Ca <sup>2+</sup> -cooperativity | 1.877   | 0.112   | P=0.7157, compared with ST1-R3Q;                                                                                                              | 8  |
|                | ST1-R3Q                | Apparent Ca <sup>2+</sup> -cooperativity | 1.825   | 0.088   | see above                                                                                                                                     | 10 |

|                  |                    |                                 |         |         |                                                   |    |
|------------------|--------------------|---------------------------------|---------|---------|---------------------------------------------------|----|
| Suppl<br>Fig.5 b | WT                 | mIPSC<br>Frequency (Hz)         | 2.061   | 0.198   | P<0.001, compared with ST1-D2N<br>and all others; | 10 |
|                  | ST1-D2N            | mIPSC<br>Frequency (Hz)         | 5.63    | 0.606   | P<0.001, compared with all others;                | 13 |
|                  | WT+BAPTA-AM        | mIPSC<br>Frequency (Hz)         | 0.156   | 0.028   | P<0.1505, compared with ST1-<br>D2N+BAPTA-AM;     | 10 |
|                  | ST1-D2N + BAPTA-AM | mIPSC<br>Frequency (Hz)         | 0.232   | 0.039   | see above                                         | 13 |
| Suppl.<br>Fig.9  | WT                 | Kd for<br>Ca <sup>2+</sup> (mM) | 1.92581 | 0.09797 |                                                   | 8  |
|                  | Syt1 2xL           | Kd for<br>Ca <sup>2+</sup> (mM) | 2.05325 | 0.12141 |                                                   | 12 |
|                  | WT                 | Apparent<br>cooperativity       | 2.55757 | 0.15808 |                                                   | 8  |
|                  | Syt1 2xL           | Apparent<br>cooperativity       | 2.66923 | 0.17942 |                                                   | 12 |

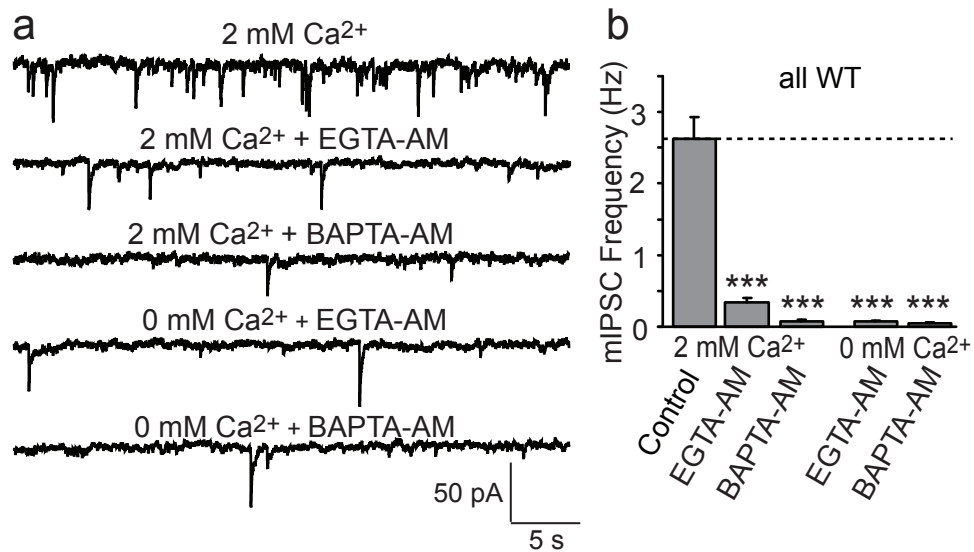

### Supplementary Figure 1

#### Effect of the Ca<sup>2+</sup>-chelators EGTA-AM and BAPTA-AM on the mini frequency in wild-type cortical neurons.

mIPSCs were monitored in cortical neurons in extracellular medium containing 2 mM or 0 mM Ca<sup>2+</sup>. Neurons were cultured from wild-type mice, and were preincubated with as indicated 10 μM EGTA-AM or BAPTA-AM at 37 °C for 1 hr in 2 or 0 mM extracellular Ca<sup>2+</sup> before recordings. Note that EGTA-AM is a much slower Ca<sup>2+</sup>-chelator than BAPTA-AM, and thus not as effective as BAPTA-AM in extracellular medium containing Ca<sup>2+</sup> because Ca<sup>2+</sup>-fluxes originating from Ca<sup>2+</sup>-channels or internal Ca<sup>2+</sup>-stores are not buffered away quickly.

a, Representative traces The calibration bars at the bottom apply to all traces.

b, Summary graphs (means ± SEMs; see Suppl. Table 1 for numerical parameters; \*\*\*=p<0.001 as determined by Student's t-test).

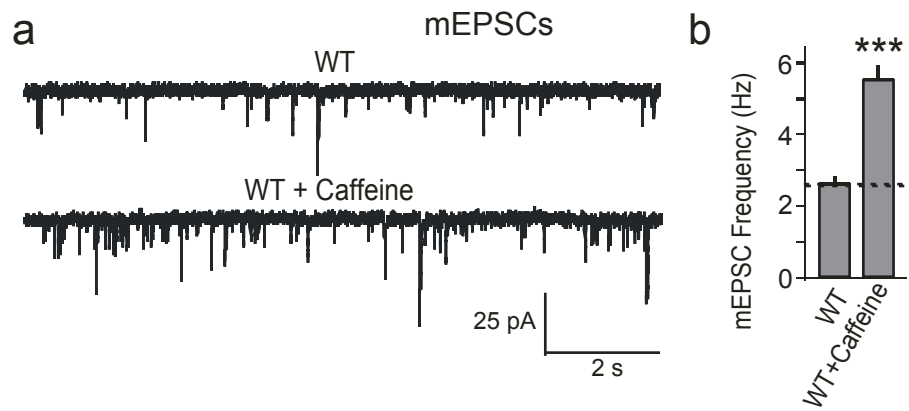

**Supplementary Figure 2**

**Effect of caffeine on spontaneous mini release in wild-type cortical neurons.**

Caffeine was applied to cultured wild-type neurons, and mEPSCs were measured before and after the application.

a, Representative traces (calibration bars at the bottom apply to all traces above the bars).

b, Summary graphs (means  $\pm$  SEMs; see Suppl. Table 1 for numerical parameters; \*\*\*= $p < 0.001$  as determined by Student's t-test).

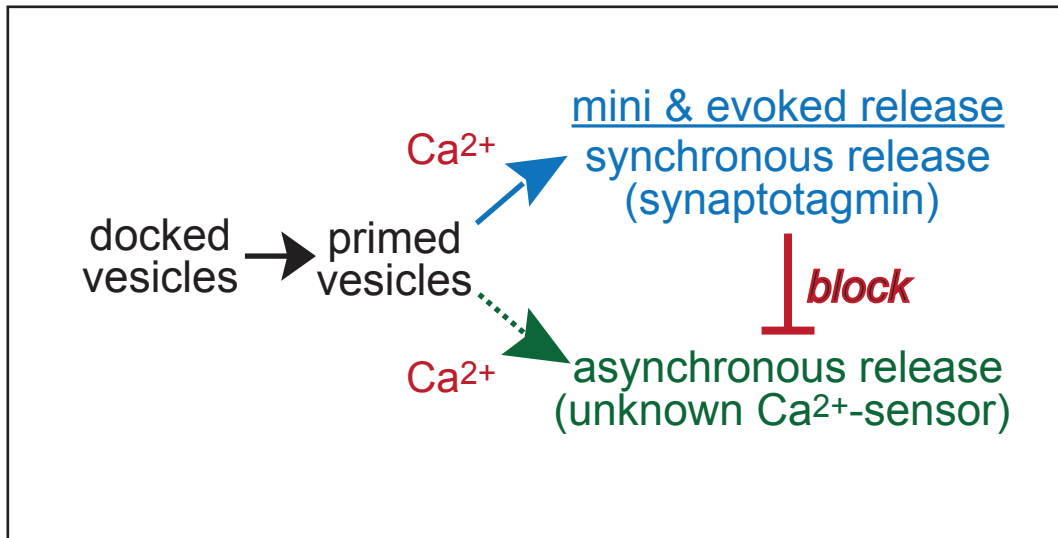

**Supplementary Figure 3**

**Hypothesis for a common mechanism of evoked and spontaneous mini release in synapses.**

Both evoked and spontaneous release are proposed to be triggered by Ca<sup>2+</sup>-binding to Syt1 which simultaneously blocks a second Ca<sup>2+</sup>-sensor that triggers asynchronous release (dotted green arrow). Upon deletion of Syt1, the second Ca<sup>2+</sup>-sensor that exhibits a higher apparent Ca<sup>2+</sup>-affinity than Syt1 is activated, resulting in an increase in spontaneous release.

### a Evoked IPSCs

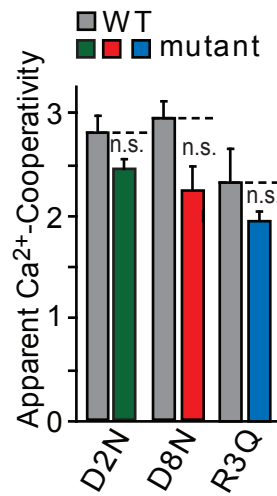

### b mini mIPSCs

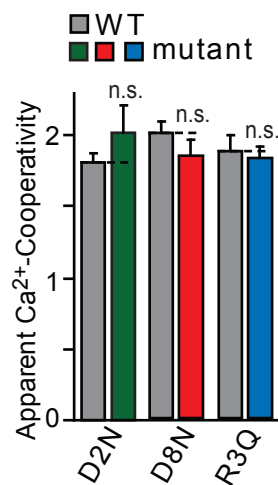

#### Supplementary Figure 4

**Summary graphs of synaptic parameters observed in cortical neurons cultured from littermate wild-type control mice and synaptotagmin-1 knockin mice carrying mutations in the synaptotagmin Ca<sup>2+</sup>-binding sites.**

a, Apparent Ca<sup>2+</sup>-cooperativity of evoked IPSCs, as determined by Hill equation fitting to the data shown in Fig. 3.

b, Apparent Ca<sup>2+</sup>-cooperativity of spontaneous mIPSCs, as determined by Hill equation fitting to the data shown in Fig. 4.

Data shown are means  $\pm$  SEMs; see Suppl. Table 1 for numerical parameters (\*\*= $p < 0.001$  as determined by Student's t-test; n.s. = non-significant).

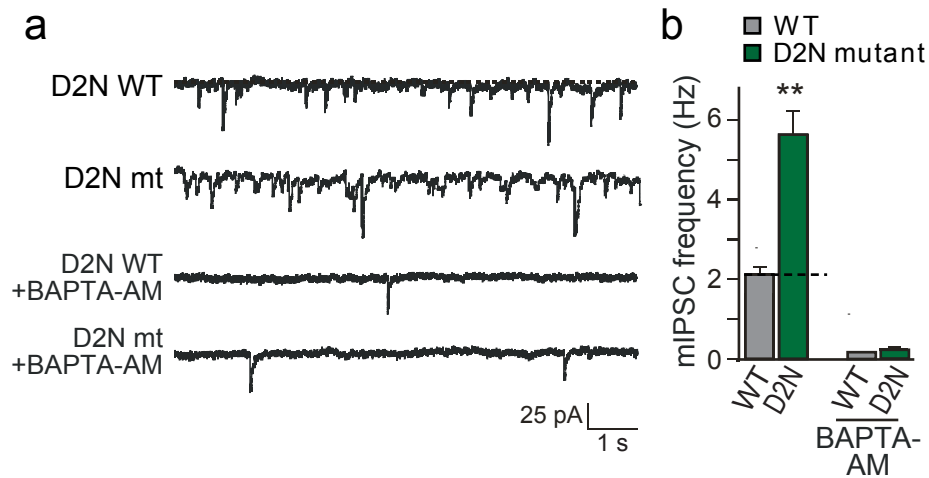

**Supplementary Figure 5**

**mIPSCs are increased in frequency in D2N-mutant synaptotagmin-1 knockin mice, but can be fully blocked by preincubation with BAPTA-AM.**

mIPSCs were monitored in cultured cortical neurons from Syt1 D2N and littermate wild-type control mice by whole-cell voltage-clamp recordings in the presence of 50  $\mu$ M APV, 20  $\mu$ M CNQX, and 1  $\mu$ M TTX. In the BAPTA-AM treatment experiment, the neurons were pretreated with 10  $\mu$ M BAPTA-AM for 1 hr in a 37  $^{\circ}$ C incubator before recording; during the recordings, 10  $\mu$ M BAPTA-AM were added to the Ca<sup>2+</sup>-free ACSF in the bath to fully suppress the intracellular Ca<sup>2+</sup>.

a, Representative traces (calibration bars at the bottom apply to all traces above the bars)

b, Summary graphs (means  $\pm$  SEMs; see Suppl. Table 1 for numerical parameters;

\*\*\*=p<0.001 as determined by Student's t-test).



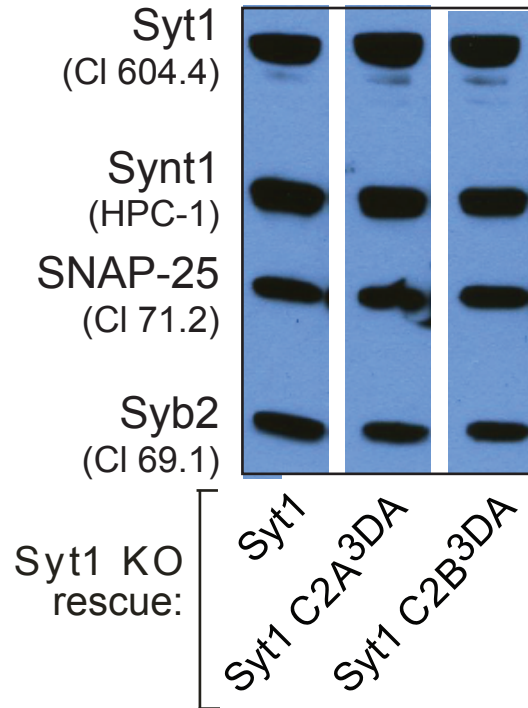

**Supplementary Figure 6**

**Representative immunoblots of synaptotagmin-1 KO neurons infected with lentivirus expressing wild-type synaptotagmin-1 (Syt1), or mutant synaptotagmin-1 with the C2A- or C2B-domain 3DA mutations.**

The image shows three lanes excised from the same blot of the neuronal proteins labeled with antibodies to synaptotagmin-1 (Syt1), syntaxin-1 (Synt1), SNAP-25, or synaptobrevin-2 (Syb2). Immunoreactive bands were visualized by ECL. Note that although the experiment shown does not represent a quantitative comparison, the image reveals that the exogenous synaptotagmin-1 forms are expressed at similar levels when compared to the endogenous synaptic proteins (syntaxin-1, synaptobrevin-2, and SNAP-25) analyzed on the same blots (see Fig. 6a for a description of the mutations).

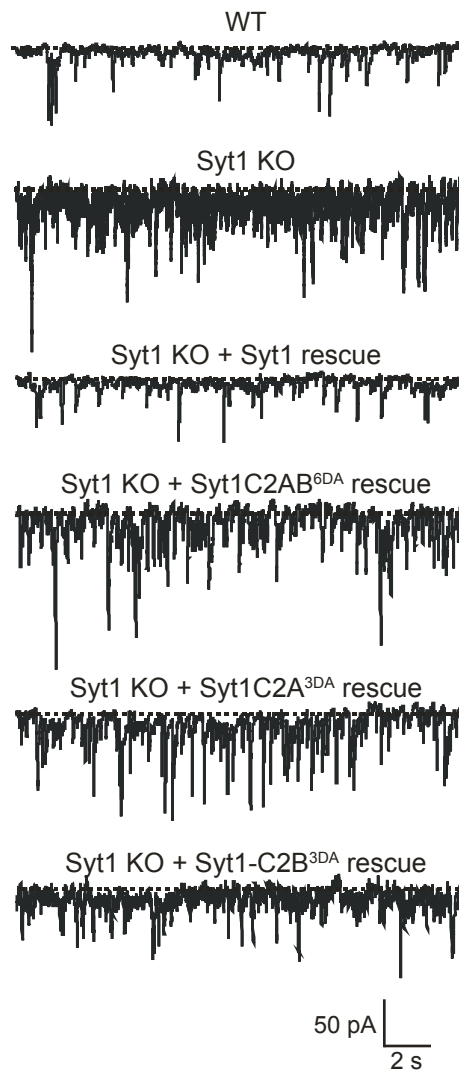

**Supplementary Figure 7**

**Representative traces of mIPSCs monitored in cortical neurons cultured from wild-type mice (WT) or from synaptotagmin-1 KO mice (Syt1 KO) that were either infected with control lentivirus, or with lentivirus expressing wild-type synaptotagmin-1 (Syt1 rescue) or various mutants of synaptotagmin-1 as indicated. Recordings were performed at the standard extracellular Ca<sup>2+</sup>-concentration.**

The calibration bars at the bottom apply to all traces above the bars.

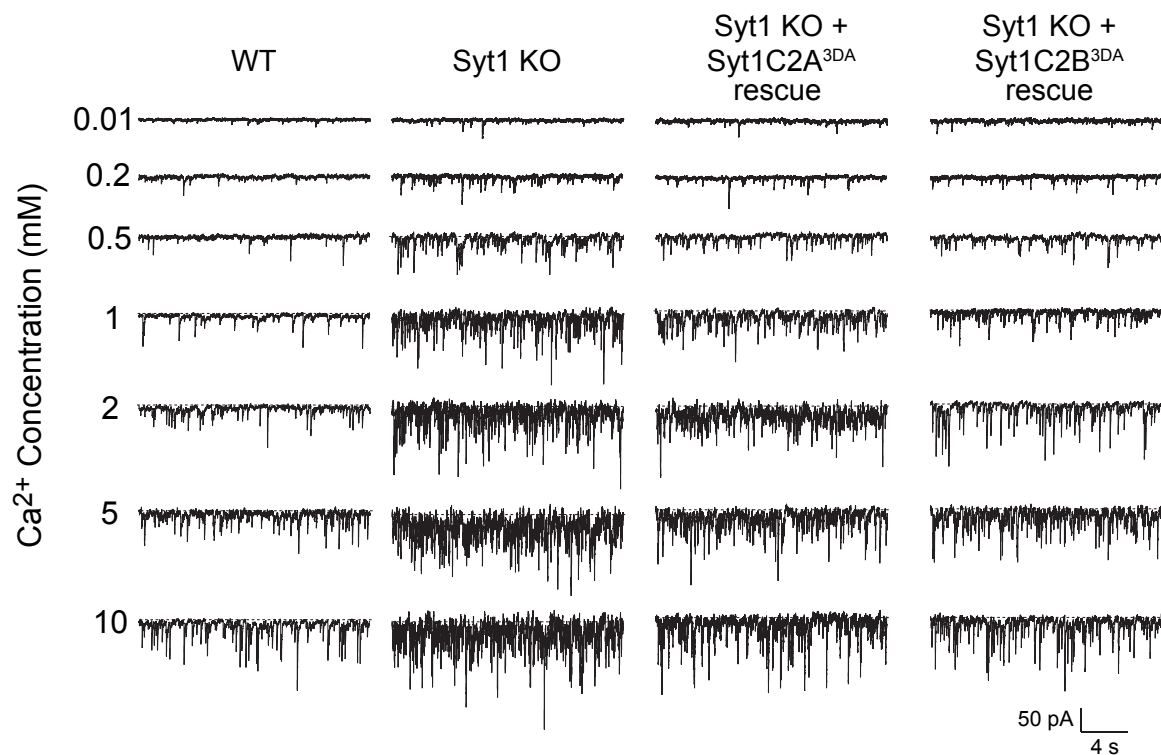

**Supplementary Figure 8**

**Representative traces of mIPSCs recorded in cortical neurons cultured from wild-type mice or synaptotagmin-1 KO mice either infected with a control lentivirus (Syt1 KO), or with lentivirus expressing the C2A- or C2B-domain Ca<sup>2+</sup>-binding site mutant of synaptotagmin-1, monitored at increasing concentrations of extracellular Ca<sup>2+</sup>.**

Neurons were cultured from wild-type mice (WT) or from synaptotagmin-1 KO mice (Syt1 KO) that were either infected with control lentivirus, or with lentivirus expressing mutant synaptotagmin-1 unable to bind Ca<sup>2+</sup> to its C2A-domain (Syt1-C2A3DA rescue) or to its C2B-domain (Syt1-C2B3DA rescue). The calibration bar at the bottom apply to all traces above the bar.

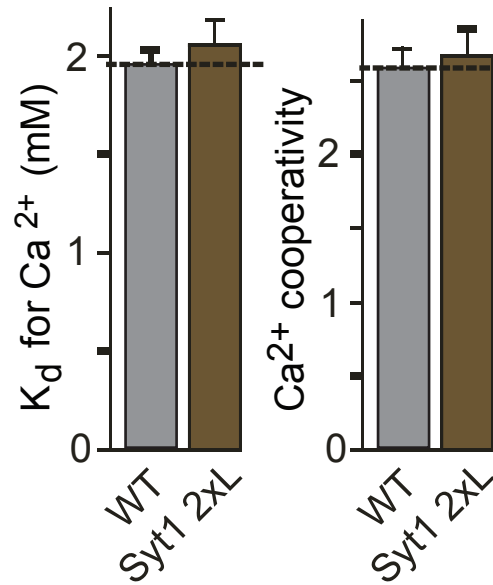

**Supplementary Figure 9**

**Membrane proximity of Syt1 C2-domains does not alter apparent Ca<sup>2+</sup>-affinity or -cooperativity of evoked release**

IPSCs were measured in neurons from littermate wild-type mice and Syt-1 KO mice expressing mutant Syt1 in which the linker sequence was duplicated (see Fig. 7a). The mean apparent Ca<sup>2+</sup>-cooperativity and Ca<sup>2+</sup>-affinity of evoked IPSCs was determined by Hill function fitting to individual experiments titrating the IPSC size as a function of the extracellular Ca<sup>2+</sup>-concentration (see Figs. 7b and 7c). Data shown are means ± SEMs (see Suppl. Table S1 for all numerical values).
